# Supplementary material
Source: PubMed Central journal article supplement (PMC4792688)
Supplement: NIHMS746756-supplement-1.pdf [file NIHMS746756-supplement-1.pdf]

## APPENDIX

**Supplementary Table 1. NSABP Protocol B-35 Reasons for Stopping Therapy**

| <b>Reason for Stopping Therapy</b>                   | <b>Number of Patients</b> |                    |              |
|------------------------------------------------------|---------------------------|--------------------|--------------|
|                                                      | <b>Tamoxifen</b>          | <b>Anastrozole</b> | <b>Total</b> |
| Treatment completed                                  | 997                       | 1000               | 1997         |
| Toxicity/side effects                                | 223                       | 232                | 455          |
| Patient refusal to complete treatment                | 137                       | 133                | 270          |
| Patient refusal to begin treatment                   | 14                        | 18                 | 32           |
| Disease progression                                  | 87                        | 78                 | 165          |
| Death                                                | 12                        | 6                  | 18           |
| Alternative therapy                                  | 5                         | 2                  | 7            |
| Patient off-treatment for other complicating disease | 30                        | 31                 | 61           |
| Consent Withdrawal/Lost to follow-up                 | 10                        | 17                 | 27           |
| Other                                                | 37                        | 35                 | 72           |
| <b>Total</b>                                         | <b>1552</b>               | <b>1552</b>        | <b>3104</b>  |
